# Supplementary material for: Endophytic bacteria with allelopathic potential regulate gene expression and metabolite production in host Casuarina equisetifolia
Source: Front Plant Sci. 2024 Sep 18;15:1435440. doi: 10.3389/fpls.2024.1435440 (PMC11445032; doi:10.3389/fpls.2024.1435440)
Supplement: Supplementary file 1 [file Table1.xls]

## Sheet: TableS1
Supplementary Table1. Transposons in the XYG 6 genome
Transposon ID	Sample_name	Start	End	Transposon families	Match Start	Match End	Evalue
chain00001	XYG6	1550493	1550711	helitronORF	850	924	2e-06
chain00002	XYG6	2080242	2080604	LINE	915	1037	9e-07

## Sheet: TableS2
Supplementary Table2. The secondary metabolite synthesis gene clusters in the XAG3 genome
Sample Name	Type	Gene ID	NR Description	Location
XAG3	lanthipeptide	pA_gene0003	dsDNA nuclease domain-containing protein	PlasmidA
XAG3	lanthipeptide	pA_gene0004	hypothetical protein	PlasmidA
XAG3	lanthipeptide	pA_gene0005	AAA family ATPase	PlasmidA
XAG3	lanthipeptide	pA_gene0006	MULTISPECIES: hypothetical protein	PlasmidA
XAG3	lanthipeptide	pA_gene0007	site-specific integrase	PlasmidA
XAG3	lanthipeptide	pA_gene0008	helix-turn-helix domain-containing protein	PlasmidA
XAG3	lanthipeptide	pA_gene0009	hypothetical protein	PlasmidA
XAG3	lanthipeptide	pA_gene0010	-	PlasmidA
XAG3	lanthipeptide	pA_gene0011	class III lanthipeptide	PlasmidA
XAG3	lanthipeptide	pA_gene0012	class III lanthipeptide	PlasmidA
XAG3	lanthipeptide	pA_gene0013	class III lanthipeptide	PlasmidA
XAG3	lanthipeptide	pA_gene0014	class III lanthionine synthetase LanKC	PlasmidA
XAG3	lanthipeptide	pA_gene0015	-	PlasmidA
XAG3	lanthipeptide	pA_gene0016	class III lanthipeptide	PlasmidA
XAG3	lanthipeptide	pA_gene0017	hypothetical protein	PlasmidA
XAG3	lanthipeptide	pA_gene0018	ABC transporter ATP-binding protein/permease	PlasmidA
XAG3	lanthipeptide	pA_gene0019	hypothetical protein	PlasmidA
XAG3	lanthipeptide	pA_gene0020	MULTISPECIES: hypothetical protein	PlasmidA
XAG3	lanthipeptide	pA_gene0024	cell wall hydrolase	PlasmidA
XAG3	lanthipeptide	pA_gene0025	anti-repressor SinI family protein	PlasmidA
XAG3	lanthipeptide	pA_gene0026	anti-repressor SinI family protein	PlasmidA
XAG3	lanthipeptide	pA_gene0027	AbrB/MazE/SpoVT family DNA-binding domain-containing protein	PlasmidA
XAG3	lanthipeptide	pA_gene0028	Spo0E family sporulation regulatory protein-aspartic acid phosphatase	PlasmidA
XAG3	T3PKS	gene1441	MULTISPECIES: response regulator transcription factor	Chromosome
XAG3	T3PKS	gene1442	MULTISPECIES: alpha-glucosidase	Chromosome
XAG3	T3PKS	gene1443	MULTISPECIES: class I SAM-dependent RNA methyltransferase	Chromosome
XAG3	T3PKS	gene1444	MULTISPECIES: hypothetical protein	Chromosome
XAG3	T3PKS	gene1445	MULTISPECIES: carbohydrate ABC transporter permease	Chromosome
XAG3	T3PKS	gene1446	MULTISPECIES: sugar ABC transporter permease	Chromosome
XAG3	T3PKS	gene1447	MULTISPECIES: extracellular solute-binding protein	Chromosome
XAG3	T3PKS	gene1448	MULTISPECIES: sn-glycerol-3-phosphate ABC transporter ATP-binding protein UgpC	Chromosome
XAG3	T3PKS	gene1449	MULTISPECIES: hypothetical protein	Chromosome
XAG3	T3PKS	gene1450	MULTISPECIES: ATP-dependent DNA helicase	Chromosome
XAG3	T3PKS	gene1451	MULTISPECIES: carboxypeptidase M32	Chromosome
XAG3	T3PKS	gene1452	MULTISPECIES: xanthine phosphoribosyltransferase	Chromosome
XAG3	T3PKS	gene1453	MULTISPECIES: purine permease	Chromosome
XAG3	T3PKS	gene1454	MULTISPECIES: LysR family transcriptional regulator	Chromosome
XAG3	T3PKS	gene1455	MULTISPECIES: NAD-dependent succinate-semialdehyde dehydrogenase	Chromosome
XAG3	T3PKS	gene1456	MULTISPECIES: GNAT family N-acetyltransferase	Chromosome
XAG3	T3PKS	gene1457	MULTISPECIES: type III polyketide synthase	Chromosome
XAG3	T3PKS	gene1458	MULTISPECIES: isoprenylcysteine carboxyl methyltransferase	Chromosome
XAG3	T3PKS	gene1459	MULTISPECIES: dynamin family protein	Chromosome
XAG3	T3PKS	gene1460	MULTISPECIES: nucleotidyltransferase domain-containing protein	Chromosome
XAG3	T3PKS	gene1461	MULTISPECIES: DUF2533 family protein	Chromosome
XAG3	T3PKS	gene1462	hypothetical protein	Chromosome
XAG3	T3PKS	gene1463	MULTISPECIES: divergent PAP2 family protein	Chromosome
XAG3	T3PKS	gene1464	DUF6123 family protein	Chromosome
XAG3	T3PKS	gene1465	MULTISPECIES: reverse transcriptase-like protein	Chromosome
XAG3	T3PKS	gene1466	MULTISPECIES: ribonuclease H family protein	Chromosome
XAG3	T3PKS	gene1467	MULTISPECIES: zinc-finger domain-containing protein	Chromosome
XAG3	T3PKS	gene1468	MULTISPECIES: DUF2564 family protein	Chromosome
XAG3	T3PKS	gene1469	MULTISPECIES: cold-shock protein CspD	Chromosome
XAG3	T3PKS	gene1470	MULTISPECIES: hypothetical protein	Chromosome
XAG3	T3PKS	gene1471	MULTISPECIES: MFS transporter	Chromosome
XAG3	T3PKS	gene1472	tetratricopeptide repeat protein	Chromosome
XAG3	T3PKS	gene1473	purine/pyrimidine permease	Chromosome
XAG3	T3PKS	gene1474	MULTISPECIES: M55 family metallopeptidase	Chromosome
XAG3	terpene	gene0675	MULTISPECIES: hypothetical protein	Chromosome
XAG3	terpene	gene0675	MULTISPECIES: hypothetical protein	Chromosome
XAG3	terpene	gene0676	MULTISPECIES: spore gernimation protein	Chromosome
XAG3	terpene	gene0677	MULTISPECIES: spore gernimation protein	Chromosome
XAG3	terpene	gene0678	MULTISPECIES: spore germination protein	Chromosome
XAG3	terpene	gene0679	DUF418 domain-containing protein	Chromosome
XAG3	terpene	gene0680	MULTISPECIES: DUF1516 family protein	Chromosome
XAG3	terpene	gene0681	MULTISPECIES: DUF2777 domain-containing protein	Chromosome
XAG3	terpene	gene0682	MULTISPECIES: asparagine synthase (glutamine-hydrolyzing)	Chromosome
XAG3	terpene	gene0683	MULTISPECIES: phytoene desaturase	Chromosome
XAG3	terpene	gene0684	MULTISPECIES: phytoene desaturase	Chromosome
XAG3	terpene	gene0685	phytoene/squalene synthase family protein	Chromosome
XAG3	terpene	gene0686	MULTISPECIES: P-II family nitrogen regulator	Chromosome
XAG3	terpene	gene0687	MULTISPECIES: ammonium transporter	Chromosome
XAG3	terpene	gene0688	alpha-glucosidase C-terminal domain-containing protein	Chromosome
XAG3	terpene	gene0689	MULTISPECIES: LacI family DNA-binding transcriptional regulator	Chromosome
XAG3	terpene	gene0690	MULTISPECIES: L-glutamate gamma-semialdehyde dehydrogenase	Chromosome
XAG3	terpene	gene0691	MULTISPECIES: ornithine--oxo-acid transaminase	Chromosome
XAG3	terpene	gene0692	M20/M25/M40 family metallo-hydrolase	Chromosome
XAG3	terpene	gene1475	ABC transporter permease	Chromosome
XAG3	terpene	gene1476	ABC transporter permease	Chromosome
XAG3	terpene	gene2144	MULTISPECIES: EamA family transporter	Chromosome
XAG3	terpene	gene2144	MULTISPECIES: EamA family transporter	Chromosome
XAG3	terpene	gene2145	DUF4981 domain-containing protein	Chromosome
XAG3	terpene	gene2146	MULTISPECIES: AraC family transcriptional regulator	Chromosome
XAG3	terpene	gene2147	MULTISPECIES: hypothetical protein	Chromosome
XAG3	terpene	gene2148	MULTISPECIES: GNAT family N-acetyltransferase	Chromosome
XAG3	terpene	gene2149	MULTISPECIES: ABC transporter ATP-binding protein	Chromosome
XAG3	terpene	gene2150	MULTISPECIES: hypothetical protein	Chromosome
XAG3	terpene	gene2151	MULTISPECIES: GNAT family N-acetyltransferase	Chromosome
XAG3	terpene	gene2152	Sporulenol synthase	Chromosome
XAG3	terpene	gene2153	MULTISPECIES: C45 family autoproteolytic acyltransferase/hydolase	Chromosome
XAG3	terpene	gene2154	NAD(P)H-hydrate dehydratase	Chromosome
XAG3	terpene	gene2155	MULTISPECIES: hypothetical protein	Chromosome
XAG3	terpene	gene2156	MULTISPECIES: hypothetical protein	Chromosome
XAG3	terpene	gene2157	MULTISPECIES: TSUP family transporter	Chromosome
XAG3	terpene	gene2158	MULTISPECIES: TrmB family transcriptional regulator	Chromosome
XAG3	terpene	gene2159	MULTISPECIES: hypothetical protein	Chromosome
XAG3	terpene	gene2160	MULTISPECIES: FMN-dependent NADH-azoreductase	Chromosome
XAG3	terpene	gene2161	MULTISPECIES: SDR family oxidoreductase	Chromosome
XAG3	terpene	gene2162	MULTISPECIES: methyltransferase domain-containing protein	Chromosome
XAG3	terpene	gene2163	MULTISPECIES: response regulator transcription factor	Chromosome
XAG3	terpene	gene3815	MULTISPECIES: YtxH domain-containing protein	Chromosome
XAG3	terpene	gene3816	hypothetical protein	Chromosome
XAG3	terpene	gene3817	MULTISPECIES: hypothetical protein	Chromosome
XAG3	terpene	gene3818	hypothetical protein	Chromosome
XAG3	terpene	gene3819	MULTISPECIES: DUF3221 domain-containing protein	Chromosome
XAG3	terpene	gene3820	MULTISPECIES: patatin-like phospholipase family protein	Chromosome
XAG3	terpene	gene3821	MULTISPECIES: ABC transporter permease	Chromosome
XAG3	terpene	gene3822	ABC transporter ATP-binding protein	Chromosome
XAG3	terpene	gene3823	MULTISPECIES: YxeA family protein	Chromosome
XAG3	terpene	gene3824	sensor histidine kinase	Chromosome
XAG3	terpene	gene3825	MULTISPECIES: response regulator transcription factor	Chromosome
XAG3	terpene	gene3826	MULTISPECIES: phytoene/squalene synthase family protein	Chromosome
XAG3	terpene	gene3827	MULTISPECIES: FUSC family protein	Chromosome
XAG3	terpene	gene3828	YrkD	Chromosome
XAG3	terpene	gene3829	MULTISPECIES: sporulation protein	Chromosome
XAG3	terpene	gene3830	MULTISPECIES: DNA-entry nuclease	Chromosome
XAG3	terpene	gene3831	MULTISPECIES: CPBP family intramembrane metalloprotease	Chromosome
XAG3	terpene	gene3832	MULTISPECIES: UvrD-helicase domain-containing protein	Chromosome
XAG3	terpene	gene3833	putative membrane protein	Chromosome
XAG3	terpene	gene3834	enoyl-CoA hydratase/isomerase family protein	Chromosome
XAG3	terpene	gene3835	MULTISPECIES: helix-turn-helix transcriptional regulator	Chromosome
XAG3	terpene	gene3836	MULTISPECIES: cytochrome P450	Chromosome

## Sheet: TableS3
Supplementary Table3. The secondary metabolite synthesis gene clusters in the XYG6 genome
Sample Name	Type	Gene ID	NR Description	Location
XYG6	lanthipeptide	gene0777	hypothetical protein	Chromosome
XYG6	lanthipeptide	gene0778	magnesium/cobalt transporter CorA	Chromosome
XYG6	lanthipeptide	gene0779	DNA-3-methyladenine glycosylase	Chromosome
XYG6	lanthipeptide	gene0780	23S rRNA (uracil(1939)-C(5))-methyltransferase RlmD	Chromosome
XYG6	lanthipeptide	gene0781	S8 family serine peptidase	Chromosome
XYG6	lanthipeptide	gene0782	ABC transporter ATP-binding protein/permease	Chromosome
XYG6	lanthipeptide	gene0783	class III lanthionine synthetase LanKC	Chromosome
XYG6	lanthipeptide	gene0784	MULTISPECIES: class III lanthipeptide	Chromosome
XYG6	lanthipeptide	gene0785	class III lanthipeptide	Chromosome
XYG6	lanthipeptide	gene0786	MULTISPECIES: class III lanthipeptide	Chromosome
XYG6	lanthipeptide	gene0787	MULTISPECIES: class III lanthipeptide	Chromosome
XYG6	lanthipeptide	gene0788	MULTISPECIES: class III lanthipeptide	Chromosome
XYG6	lanthipeptide	gene0789	MULTISPECIES: class III lanthipeptide	Chromosome
XYG6	lanthipeptide	gene0790	MULTISPECIES: membrane protein	Chromosome
XYG6	lanthipeptide	gene0791	tRNA-dihydrouridine synthase	Chromosome
XYG6	lanthipeptide	gene0792	MULTISPECIES: hypothetical protein	Chromosome
XYG6	lanthipeptide	gene0793	acetoin:2,6-dichlorophenolindophenol oxidoreductase subunit alpha	Chromosome
XYG6	lanthipeptide	gene0794	MULTISPECIES: acetoin:2,6-dichlorophenolindophenol oxidoreductase subunit beta	Chromosome
XYG6	lanthipeptide	gene0795	2-oxo acid dehydrogenase subunit E2	Chromosome
XYG6	lanthipeptide	gene0796	dihydrolipoyl dehydrogenase	Chromosome
XYG6	T3PKS	gene1965	MULTISPECIES: dihydrofolate reductase	Chromosome
XYG6	T3PKS	gene1966	MULTISPECIES: thymidylate synthase	Chromosome
XYG6	T3PKS	gene1967	MULTISPECIES: YpjP family protein	Chromosome
XYG6	T3PKS	gene1968	class I SAM-dependent methyltransferase	Chromosome
XYG6	T3PKS	gene1969	MULTISPECIES: BrxA/BrxB family bacilliredoxin	Chromosome
XYG6	T3PKS	gene1970	MULTISPECIES: dihydroxy-acid dehydratase	Chromosome
XYG6	T3PKS	gene1971	conserved virulence factor C family protein	Chromosome
XYG6	T3PKS	gene1972	HD domain-containing protein	Chromosome
XYG6	T3PKS	gene1973	MULTISPECIES: glutathione peroxidase	Chromosome
XYG6	T3PKS	gene1974	hypothetical protein	Chromosome
XYG6	T3PKS	gene1975	Homoserine O-succinyltransferase	Chromosome
XYG6	T3PKS	gene1976	MULTISPECIES: diglucosyl diacylglycerol synthase	Chromosome
XYG6	T3PKS	gene1977	MULTISPECIES: cold-shock protein CspD	Chromosome
XYG6	T3PKS	gene1978	MULTISPECIES: hypothetical protein	Chromosome
XYG6	T3PKS	gene1979	MULTISPECIES: DUF2564 family protein	Chromosome
XYG6	T3PKS	gene1980	MULTISPECIES: zinc-finger domain-containing protein	Chromosome
XYG6	T3PKS	gene1981	ribonuclease H family protein	Chromosome
XYG6	T3PKS	gene1982	MULTISPECIES: queuosine precursor transporter	Chromosome
XYG6	T3PKS	gene1983	hypothetical protein	Chromosome
XYG6	T3PKS	gene1984	MULTISPECIES: small, acid-soluble spore protein L	Chromosome
XYG6	T3PKS	gene1985	MULTISPECIES: 5'-3' exonuclease	Chromosome
XYG6	T3PKS	gene1986	MULTISPECIES: hypothetical protein	Chromosome
XYG6	T3PKS	gene1987	MULTISPECIES: YpbS family protein	Chromosome
XYG6	T3PKS	gene1988	dynamin family protein	Chromosome
XYG6	T3PKS	gene1989	MULTISPECIES: isoprenylcysteine carboxyl methyltransferase family protein	Chromosome
XYG6	T3PKS	gene1990	type III polyketide synthase	Chromosome
XYG6	T3PKS	gene1991	GNAT family N-acetyltransferase	Chromosome
XYG6	T3PKS	gene1992	MGMT family protein	Chromosome
XYG6	T3PKS	gene1993	hypothetical protein	Chromosome
XYG6	T3PKS	gene1994	MULTISPECIES: DUF3800 domain-containing protein	Chromosome
XYG6	T3PKS	gene1995	MULTISPECIES: helix-turn-helix domain-containing protein	Chromosome
XYG6	T3PKS	gene1996	hypothetical protein	Chromosome
XYG6	T3PKS	gene1997	DUF3862 domain-containing protein	Chromosome
XYG6	T3PKS	gene1998	glycosyltransferase	Chromosome
XYG6	T3PKS	gene1999	MULTISPECIES: glycosyltransferase	Chromosome
XYG6	T3PKS	gene2000	MULTISPECIES: N-acetylmuramoyl-L-alanine amidase	Chromosome
XYG6	T3PKS	gene2001	MULTISPECIES: phage holin family protein	Chromosome
XYG6	T3PKS	gene2002	MULTISPECIES: XkdX family protein	Chromosome
XYG6	T3PKS	gene2003	MULTISPECIES: hypothetical protein	Chromosome
XYG6	T3PKS	gene2004	MULTISPECIES: BppU family phage baseplate upper protein	Chromosome
XYG6	T3PKS	gene2005	peptidase G2	Chromosome
XYG6	T3PKS	gene2006	MULTISPECIES: phage tail protein	Chromosome
XYG6	T3PKS	gene2007	MULTISPECIES: phage tail family protein	Chromosome
XYG6	terpene	gene1050	hypothetical protein	Chromosome
XYG6	terpene	gene1051	MULTISPECIES: spore germination protein	Chromosome
XYG6	terpene	gene1052	spore germination protein GerPE	Chromosome
XYG6	terpene	gene1053	MULTISPECIES: hypothetical protein	Chromosome
XYG6	terpene	gene1054	MULTISPECIES: spore germination protein GerPC	Chromosome
XYG6	terpene	gene1055	MULTISPECIES: spore germination protein GerPB	Chromosome
XYG6	terpene	gene1056	MULTISPECIES: spore germination protein	Chromosome
XYG6	terpene	gene1057	aspartyl-phosphate phosphatase Spo0E family protein	Chromosome
XYG6	terpene	gene1058	MULTISPECIES: fumarylacetoacetate hydrolase family protein	Chromosome
XYG6	terpene	gene1059	MULTISPECIES: YisL family protein	Chromosome
XYG6	terpene	gene1060	S8 family peptidase	Chromosome
XYG6	terpene	gene1061	hypothetical protein	Chromosome
XYG6	terpene	gene1062	MULTISPECIES: asparagine synthase (glutamine-hydrolyzing)	Chromosome
XYG6	terpene	gene1063	squalene/phytoene synthase family protein	Chromosome
XYG6	terpene	gene1064	putative transporter YisQ	Chromosome
XYG6	terpene	gene1065	MULTISPECIES: AraC family transcriptional regulator	Chromosome
XYG6	terpene	gene1066	LacI family transcriptional regulator	Chromosome
XYG6	terpene	gene1067	inositol 2-dehydrogenase	Chromosome
XYG6	terpene	gene1068	uncharacterized protein SRCM101294_01225	Chromosome
XYG6	terpene	gene1069	LysE/ArgO family amino acid transporter	Chromosome
XYG6	terpene	gene1070	PLP-dependent aminotransferase family protein	Chromosome
XYG6	terpene	gene1071	pentapeptide repeat-containing protein	Chromosome
XYG6	terpene	gene1072	MULTISPECIES: GNAT family N-acetyltransferase	Chromosome
XYG6	terpene	gene1873	hypothetical protein	Chromosome
XYG6	terpene	gene1874	MULTISPECIES: LysM peptidoglycan-binding and 3D domain-containing protein	Chromosome
XYG6	terpene	gene1875	MULTISPECIES: DNA helicase RecQ	Chromosome
XYG6	terpene	gene1876	hypothetical protein	Chromosome
XYG6	terpene	gene1877	MULTISPECIES: FMN-dependent NADH-azoreductase	Chromosome
XYG6	terpene	gene1878	MULTISPECIES: TraR/DksA C4-type zinc finger protein	Chromosome
XYG6	terpene	gene1879	hypothetical protein	Chromosome
XYG6	terpene	gene1880	hypothetical protein	Chromosome
XYG6	terpene	gene1881	Hsp20/alpha crystallin family protein	Chromosome
XYG6	terpene	gene1882	MULTISPECIES: hypothetical protein	Chromosome
XYG6	terpene	gene1883	MULTISPECIES: hypothetical protein	Chromosome
XYG6	terpene	gene1884	MULTISPECIES: PH domain-containing protein	Chromosome
XYG6	terpene	gene1885	MULTISPECIES: DUF6501 family protein	Chromosome
XYG6	terpene	gene1886	aldehyde dehydrogenase family protein	Chromosome
XYG6	terpene	gene1887	squalene--hopene cyclase	Chromosome
XYG6	terpene	gene1888	MULTISPECIES: superoxide dismutase	Chromosome
XYG6	terpene	gene1889	sodium-dependent transporter	Chromosome
XYG6	terpene	gene1890	bile acid:sodium symporter family protein	Chromosome
XYG6	terpene	gene1891	hypothetical protein	Chromosome
XYG6	terpene	gene1892	MULTISPECIES: 2-oxoglutarate dehydrogenase complex dihydrolipoyllysine-residue succinyltransferase	Chromosome
XYG6	terpene	gene1893	MULTISPECIES: 2-oxoglutarate dehydrogenase E1 component	Chromosome

## Sheet: TableS4
Supplementary Table4. The metabolites were differentially expressed in C. equisetifolia after infection by Bacillus
Metabolite	Metab ID	P_value	FDR	MIX36_mean	MIX36_SD	BAR3_mean	BAR3_SD	CK_mean	CK_SD	BYR6_mean	BYR6_SD	BYR6_vs_CK	CK_vs_MIX36	BAR3_vs_CK	BYR6_vs_MIX36	BAR3_vs_BYR6	BAR3_vs_MIX36
Isobutylpropylamine	metab_4360	0.0003217	0.01526	7.246	0.03249	7.144	0.03822	7.127	0.03465	7.216	0.02895	0.002171	8.195e-05	0.8577	0.5135	0.01376	0.0005185
9,10-DHOME	metab_1940	0.01049	0.1643	7.029	0.03765	7.071	0.02848	7.064	0.02991	7.011	0.0236	0.05218	0.2922	0.9833	0.788	0.02383	0.1593
Propyl 2,4-decadienoate	metab_67	0.03021	0.3031	6.992	0.02784	6.943	0.01339	6.956	0.04525	6.956	0.0324	1	0.3085	0.9175	0.3085	0.9175	0.101
Citrulline	metab_17521	0.0293	0.6855	6.437	0.07967	6.372	0.1026	6.415	0.08464	6.301	0.05557	0.1595	0.9746	0.8444	0.07119	0.5388	0.6084
Choline	metab_8197	0.04007	0.3467	6.549	0.03427	6.561	0.04279	6.529	0.02746	6.603	0.042	0.02275	0.8323	0.5397	0.1308	0.3092	0.9566
(-)-Catechin gallate	metab_8217	0.02754	0.6855	6.292	0.143	6.265	0.1748	6.47	0.08603	6.233	0.1799	0.09103	0.2731	0.1703	0.9263	0.9869	0.992
Chalcolactone	metab_352	0.03176	0.31	6.459	0.07223	6.386	0.03613	6.303	0.1035	6.482	0.09215	0.009652	0.02672	0.3837	0.9689	0.2628	0.4937
L-beta-homothreonine	metab_627	0.02449	0.2705	6.416	0.1179	6.306	0.05481	6.407	0.06584	6.306	0.02314	0.1665	0.9974	0.1665	0.117	1	0.117
Sebacic acid	metab_4433	0.005682	0.1098	6.34	0.03609	6.39	0.02935	6.376	0.03169	6.323	0.02202	0.05107	0.2666	0.8851	0.8133	0.01019	0.0705
L-Ornithine	metab_629	0.007116	0.1286	6.289	0.103	6.201	0.07414	6.319	0.06509	6.178	0.0391	0.0305	0.919	0.08488	0.1134	0.9609	0.2674
Homoorietin	metab_8721	0.02861	0.6855	5.688	0.4219	5.466	0.291	5.542	0.2025	5.977	0.2424	0.1339	0.8707	0.9784	0.4483	0.06138	0.6579
D-Urobilin	metab_11681	0.01103	0.6233	5.814	0.4702	5.354	0.7516	5.167	0.566	6.267	0.3336	0.02257	0.2791	0.9504	0.578	0.07044	0.5658
Lubiprostone	metab_4021	4.876e-05	0.004046	5.764	0.04063	5.889	0.07355	5.902	0.03525	5.757	0.02584	0.0004483	0.0007758	0.9726	0.9955	0.001243	0.002154
Dihydroroseoside	metab_939	0.03776	0.3379	5.914	0.1253	5.664	0.1175	5.743	0.2918	5.829	0.1231	0.8759	0.458	0.9004	0.8795	0.4884	0.1579
3-Hydroxydodecanoic acid	metab_4678	2.694e-05	0.002649	5.728	0.03848	5.831	0.01777	5.827	0.04018	5.71	0.0305	7.486e-05	0.0005532	0.9975	0.826	4.845e-05	0.000353
Melleolide	metab_5515	0.006222	0.1166	5.814	0.05839	5.708	0.01992	5.766	0.05931	5.782	0.06031	0.9628	0.4875	0.3257	0.7729	0.1467	0.02023
Erinapyrone C	metab_16700	0.04079	0.6855	5.348	0.1447	5.636	0.1491	5.631	0.2735	5.386	0.5161	0.6073	0.4912	1	0.9974	0.5919	0.4763
Feruloyl-beta-sitosterol	metab_13362	0.03027	0.6855	5.558	0.1165	5.494	0.2299	5.293	0.1252	5.445	0.07889	0.3938	0.04631	0.1743	0.636	0.954	0.905
Gingerglycolipid B	metab_8329	0.03693	0.6855	5.535	0.1097	5.35	0.1065	5.268	0.1866	5.371	0.157	0.6785	0.03637	0.8075	0.3024	0.9956	0.2092
2,3-dinor Prostaglandin E1	metab_14484	0.03189	0.6855	5.317	0.2924	5.129	0.07804	5.129	0.3179	5.462	0.2045	0.1635	0.6207	1	0.7834	0.1635	0.6207
Bis(2-ethylhexyl) phthalate	metab_1893	0.02859	0.2961	5.476	0.04186	5.431	0.02673	5.405	0.02752	5.454	0.03222	0.1134	0.01185	0.6015	0.7172	0.6889	0.1621
DG(18:0/18:2(9Z,12Z)/0:0)	metab_488	0.02357	0.2643	5.396	0.08608	5.486	0.04874	5.494	0.05052	5.382	0.06652	0.05521	0.1092	0.9973	0.9862	0.08207	0.1568
(E)-2,6-Dimethyl-2,5-heptadienoic acid	metab_6751	0.008764	0.1464	5.394	0.1312	5.247	0.04237	5.463	0.1478	5.356	0.07138	0.4147	0.7445	0.02092	0.9438	0.3987	0.1653
(2'E,4'Z,7'Z,8E)-Colnelenic acid	metab_5578	0.0001719	0.00951	5.426	0.02826	5.307	0.02834	5.326	0.04934	5.385	0.03367	0.07358	0.00127	0.8397	0.3018	0.01209	0.0001798
DG(18:0/18:3(6Z,9Z,12Z)/0:0)	metab_486	9.121e-05	0.006126	5.241	0.06398	5.416	0.08045	5.408	0.05464	5.228	0.02338	0.0005008	0.00113	0.9966	0.9857	0.0003044	0.0006845
NIPECOTIC ACID	metab_2013	0.0006562	0.02486	5.293	0.02942	5.36	0.04257	5.361	0.03913	5.265	0.02014	0.001075	0.02192	1	0.5748	0.001199	0.02429
2,4-Dimethylpyridine	metab_4258	0.006185	0.1162	5.341	0.03779	5.272	0.02437	5.248	0.035	5.302	0.02641	0.05714	0.0006503	0.6324	0.2345	0.4526	0.01094
DG(8:0/13:0/0:0)	metab_1848	0.02502	0.2742	5.257	0.05321	5.297	0.03046	5.303	0.05583	5.235	0.02865	0.09775	0.3724	0.9964	0.8593	0.1468	0.4922
Kiwiionoside	metab_7098	0.04019	0.3473	5.392	0.125	5.104	0.1578	5.345	0.2096	5.25	0.134	0.7878	0.9667	0.1117	0.5149	0.4917	0.04382
Lys Lys Val Lys	metab_4952	0.0001338	0.008202	5.218	0.0433	5.293	0.03514	5.309	0.03401	5.194	0.02336	0.0001762	0.002285	0.8863	0.7006	0.0009688	0.01241
Monic acid	metab_4388	7.659e-06	0.001154	5.119	0.03388	5.254	0.06377	5.278	0.03474	5.099	0.02997	8.141e-06	4.142e-05	0.8145	0.8823	5.782e-05	0.0003168
5-Octen-2-one	metab_3853	0.003587	0.08304	5.17	0.03367	5.212	0.0129	5.196	0.03541	5.143	0.03121	0.04612	0.5262	0.8319	0.4947	0.006922	0.1464
Cer(t18:0/16:0)	metab_1857	0.01056	0.1644	5.239	0.0256	5.146	0.05634	5.141	0.08564	5.147	0.09108	0.9991	0.1503	0.9995	0.1911	1	0.1838
Trandolapril-d5 Diketopiperazine	metab_7433	0.03772	0.3379	5.009	0.3361	5.495	0.3631	4.748	0.434	5.416	0.4801	0.07385	0.7472	0.03909	0.4139	0.9899	0.2654
CP 47,497-C8-homolog C-8-hydroxy metabolite	metab_4681	0.004329	0.09472	5.05	0.1884	5.124	0.09947	5.342	0.07907	5.139	0.1296	0.09722	0.009638	0.06782	0.7113	0.9979	0.8108
(4E)-1-(3,4-dihydroxy-5-methoxyphenyl)dec-4-en-3-one	metab_4650	5.605e-05	0.004376	5.101	0.03378	5.188	0.01972	5.186	0.03545	5.084	0.02742	0.0001164	0.0009561	0.9996	0.8061	9.123e-05	0.0007446
Cer(d18:0/16:0)	metab_4580	0.00169	0.04964	5.227	0.05508	5.045	0.07497	5.019	0.09273	5.107	0.152	0.5256	0.01721	0.9768	0.2644	0.7678	0.04209
Isopropyl linoleate	metab_4496	4.179e-06	0.000887	5.035	0.04299	5.171	0.02609	5.155	0.01793	5.022	0.0294	4.438e-06	1.904e-05	0.8422	0.9074	8.052e-07	3.199e-06
4'-O-Galloylsucrose	metab_17206	0.02244	0.6855	4.856	0.1017	4.89	0.05863	5.005	0.06318	4.82	0.1795	0.07044	0.1841	0.3889	0.9569	0.76	0.9633
Aminohydroquinone	metab_2065	0.009153	0.1502	5.141	0.03266	5.082	0.02755	5.03	0.05422	5.099	0.02178	0.03054	0.0004401	0.1372	0.2876	0.8809	0.07619
D-Urobilinogen	metab_14809	0.002017	0.4383	5.111	0.3916	4.314	0.734	4.379	0.5018	5.682	0.3861	0.003713	0.1524	0.9973	0.3377	0.002341	0.1057
9,10-DiHOME	metab_3753	0.0432	0.3615	5.06	0.04093	5.096	0.03085	5.098	0.02183	5.029	0.04889	0.03556	0.3917	0.9998	0.5632	0.04267	0.4382
2-Hydroxypropyl 2-isopropyl-5-methylcyclohexyl carbonate	metab_1896	0.01876	0.2308	5.025	0.04115	5.068	0.01681	5.059	0.01828	5.007	0.03681	0.05746	0.3143	0.9656	0.787	0.02093	0.1438
(2-Butylbenzofuran-3-yl)(4-hydroxyphenyl)ketone	metab_1163	0.02053	0.2439	5.065	0.1708	5.012	0.1351	4.814	0.1608	5.145	0.1203	0.009556	0.06197	0.1821	0.8309	0.5051	0.9423
(E)-4,8-Dimethyl-1,3,7-nonatriene	metab_5587	0.03838	0.3421	5.036	0.02822	4.99	0.009586	4.993	0.04374	5	0.03168	0.9841	0.1551	0.9987	0.2829	0.9561	0.1168
2-hydroxyhexadecanoic acid	metab_13632	0.02531	0.6855	4.768	0.3139	4.509	0.1806	4.589	0.2554	5.001	0.2608	0.08311	0.6967	0.9609	0.4974	0.02979	0.4069
Chorismate	metab_10770	0.02542	0.6855	4.602	0.08505	4.68	0.135	4.792	0.08977	4.762	0.1418	0.9767	0.07361	0.4419	0.1606	0.6855	0.7175
2,4,5,7alpha-Tetrahydro-1,4,4,7a-tetramethyl-1H-inden-2-ol	metab_12023	0.00231	0.4383	4.664	0.2026	4.654	0.1367	4.89	0.05007	4.538	0.1947	0.009914	0.1406	0.1168	0.6017	0.662	0.9996
(Z,Z)-3,6-Dodecadien-1-ol	metab_1648	0.02674	0.2856	4.942	0.02666	4.896	0.01075	4.894	0.04221	4.91	0.0289	0.8268	0.07478	0.9995	0.339	0.876	0.09258
Ligustroside	metab_15181	0.02756	0.6855	4.56	0.4434	5.027	0.07987	4.423	0.5313	4.723	0.3614	0.6321	0.9461	0.1011	0.9137	0.6223	0.2674
(-)-Naringenin	metab_2848	0.01199	0.1765	4.855	0.2008	4.897	0.09018	5.023	0.09471	4.783	0.09278	0.03483	0.1971	0.4301	0.815	0.5151	0.9551
3-(3,4-Dihydroxy-5-methoxy)-2-propenoic acid	metab_15657	0.02358	0.6855	4.281	0.3126	5.039	0.51	4.193	0.587	4.963	0.5084	0.09166	0.992	0.05593	0.1563	0.9948	0.09884
M-Xylene	metab_5341	0.02724	0.2882	4.881	0.02245	4.836	0.02894	4.829	0.03803	4.84	0.02867	0.9386	0.05505	0.9829	0.1685	0.9967	0.1145
Gingerglycolipid C	metab_13819	0.02529	0.6855	4.724	0.0929	4.54	0.1122	4.554	0.1466	4.54	0.09059	0.9973	0.1115	0.9973	0.07602	1	0.07602
3-Methyl-2E-hexenoic acid	metab_1477	0.03008	0.3027	4.866	0.03119	4.814	0.01027	4.813	0.04092	4.829	0.0301	0.8393	0.0513	0.9999	0.2459	0.8632	0.05718
3,5,5-Trimethyl-3-cyclohexen-1-one	metab_3795	2.784e-06	0.0007051	4.954	0.03894	4.686	0.09807	4.652	0.05668	4.913	0.03416	7.963e-06	9.142e-07	0.8264	0.7314	5.353e-05	5.444e-06
Nb-Acetyl-Nb-methyltryptamine	metab_10930	0.01455	0.6804	4.389	0.1093	4.779	0.2443	4.417	0.2875	4.585	0.09052	0.566	0.9962	0.04438	0.4373	0.4461	0.02767
4-Hydroxycyclohexylacetic acid	metab_2823	0.04924	0.3817	4.681	0.3623	5.052	0.1625	4.6	0.4359	4.745	0.2571	0.8929	0.9786	0.1502	0.9892	0.4533	0.2925
MG(15:0/0:0/0:0)	metab_3434	0.02038	0.2432	4.804	0.02791	4.746	0.05464	4.756	0.06022	4.725	0.0431	0.7437	0.4148	0.9877	0.07316	0.9015	0.2568
UMBELLIFERONE	metab_6101	0.008363	0.1423	4.732	0.05803	4.797	0.04428	4.687	0.04222	4.778	0.05314	0.04015	0.5005	0.01056	0.4819	0.9315	0.1989
(4E,6E,d14:2) sphingosine	metab_1542	0.003011	0.07401	4.779	0.07251	4.655	0.01924	4.772	0.09362	4.733	0.04986	0.7822	0.9982	0.04364	0.6856	0.2604	0.03028
Sinapic acid	metab_15950	0.005118	0.5776	4.457	0.1424	4.385	0.04827	4.585	0.08094	4.446	0.179	0.3139	0.3838	0.07944	0.999	0.8652	0.7975
Sorbitan palmitate	metab_12542	0.0007902	0.3069	4.613	0.07777	4.37	0.1081	4.349	0.07568	4.513	0.1219	0.06591	0.001738	0.9865	0.3948	0.1278	0.003853
Nepetaside	metab_4978	0.006464	0.1196	4.66	0.05698	4.758	0.04696	4.791	0.08095	4.656	0.04963	0.009217	0.01172	0.8242	0.9996	0.0617	0.07634
Fagomine	metab_4343	1.92e-05	0.002207	4.66	0.02692	4.763	0.05615	4.783	0.03162	4.641	0.02319	2.505e-05	0.0001594	0.8282	0.8486	0.0001761	0.001188
Ethyl sorbate	metab_3801	0.01162	0.174	4.696	0.03473	4.728	0.01659	4.719	0.04861	4.669	0.02865	0.1266	0.7177	0.9756	0.6071	0.05566	0.4691
6-hydroxysphingosine	metab_5189	0.03986	0.3464	4.63	0.09077	4.827	0.1041	4.663	0.1164	4.689	0.102	0.9788	0.9584	0.08882	0.8082	0.1852	0.03129
(R)-Pelletierine	metab_15271	0.01251	0.6621	4.453	0.521	4.537	0.4064	4.056	0.2171	4.68	0.2939	0.07088	0.37	0.2156	0.7814	0.9327	0.985
1-Arachidonoylglycerophosphoinositol	metab_11512	0.005241	0.5776	4.737	0.5791	3.918	0.8181	3.758	0.8138	5.305	0.4144	0.008055	0.1343	0.9822	0.562	0.0188	0.2557
N-Acetyl-DL-glutamic acid	metab_17272	0.03284	0.6855	4.521	0.1502	4.252	0.1333	4.484	0.1329	4.37	0.1099	0.5396	0.9711	0.05123	0.3014	0.5111	0.0197
MDMA methylene homolog	metab_6479	0.04129	0.3514	4.531	0.2475	4.866	0.1366	4.445	0.3619	4.721	0.2523	0.3685	0.9546	0.08196	0.6695	0.8205	0.213
N-Decanoylglycine	metab_341	0.005122	0.1047	4.635	0.0538	4.509	0.0438	4.742	0.3137	4.621	0.06118	0.6555	0.735	0.142	0.9991	0.7072	0.6264
5-(3,5-dihydroxyphenyl)-4-hydroxypentanoic acid	metab_3064	0.00837	0.1423	4.291	0.1512	4.778	0.2267	4.695	0.6198	4.645	0.2632	0.9963	0.3225	0.9838	0.4354	0.9386	0.18
(S)-3-Octanol glucoside	metab_9544	0.004098	0.5331	4.529	0.2525	4.027	0.3696	3.941	0.3258	4.875	0.405	0.001578	0.05812	0.9788	0.4057	0.004001	0.1268
Linalyl formate	metab_14791	0.04185	0.6855	4.242	0.2022	4.348	0.1506	4.47	0.03878	4.275	0.2254	0.298	0.1807	0.6774	0.99	0.906	0.763
2-Phenylethyl formate	metab_388	0.04394	0.3635	4.56	0.01972	4.521	0.03237	4.515	0.04256	4.518	0.0324	0.9989	0.1647	0.9915	0.2115	0.9989	0.2676
S-(PGA2)-glutathione	metab_3250	0.0181	0.226	4.751	0.5327	4.212	0.8432	3.877	0.8546	5.23	0.3672	0.02333	0.2113	0.8665	0.6909	0.1163	0.6073
3,4,5-trihydroxy-6-[(2-methylpropanoyl)oxy]oxane-2-carboxylic acid	metab_8761	0.02846	0.6855	3.963	0.5783	4.634	0.2342	3.748	0.621	4.487	0.5683	0.148	0.9164	0.06267	0.4131	0.9708	0.2118
Eriojaposide B	metab_9048	0.009684	0.6231	4.132	0.3518	4.056	0.3132	4.544	0.09886	4.065	0.4713	0.1431	0.246	0.1324	0.9892	1	0.9844
2,3-Dimethyl-2-cyclohexen-1-one	metab_4859	0.02151	0.2512	4.537	0.09028	4.361	0.1223	4.22	0.3064	4.561	0.08794	0.02805	0.04451	0.5996	0.9965	0.3074	0.4161
3-O-Methylisoetharine	metab_5773	0.005229	0.1049	4.409	0.07801	4.278	0.02532	4.415	0.1298	4.374	0.06672	0.8675	0.9995	0.07462	0.9122	0.2972	0.09339
MG(0:0/14:1(9Z)/0:0)	metab_14756	0.02379	0.6855	4.074	0.2845	4.039	0.1446	3.801	0.2409	4.492	0.3453	0.002352	0.3849	0.5023	0.0885	0.05802	0.9967
2-(1-Aziridinyl)ethanol	metab_492	0.001821	0.05147	4.325	0.02546	4.362	0.02619	4.368	0.03109	4.3	0.01868	0.002134	0.06694	0.9828	0.4383	0.005056	0.1369
3,6-Dihydronicotinic acid	metab_2331	0.003714	0.0851	4.385	0.03588	4.327	0.03045	4.289	0.02822	4.339	0.03098	0.08725	0.0004738	0.2569	0.1282	0.9316	0.03818
Pulverochromenol	metab_76	0.004861	0.1022	4.559	0.4886	4.209	0.391	3.97	0.2044	4.599	0.2396	0.04444	0.06466	0.7096	0.9979	0.3217	0.414
9Z,13-Tetradecadien-11-ynal	metab_5632	0.007055	0.1283	4.316	0.2219	4.216	0.06653	4.494	0.1216	4.264	0.1315	0.0917	0.2507	0.03135	0.9435	0.9547	0.7089
(R)-2-Hydroxycaprylic acid	metab_15700	0.01678	0.6855	3.837	0.5617	4.56	0.1471	3.666	0.6954	4.154	0.5395	0.4795	0.9561	0.06175	0.7814	0.6268	0.1654
Ganoderic acid H	metab_14330	0.02372	0.6855	4.025	0.4744	3.841	0.8297	3.612	0.417	4.598	0.45	0.05409	0.6675	0.9202	0.4055	0.1839	0.9562
Tetracosapentaenoic acid (24:5n-3)	metab_1750	0.04616	0.3728	4.402	0.3661	4.008	0.1848	4.538	0.3777	4.17	0.3126	0.2939	0.908	0.06964	0.6688	0.8555	0.24
3-Pyridinaldehyde	metab_113	0.002313	0.0613	4.3	0.03272	4.228	0.03129	4.191	0.03728	4.242	0.03421	0.113	0.0002588	0.3396	0.05924	0.9153	0.01439
6-hydroxy-4-Undecanolide	metab_6223	0.01526	0.2058	4.089	0.1038	4.25	0.05083	4.311	0.09693	4.165	0.09621	0.07572	0.003867	0.7099	0.5507	0.4572	0.04384
(1S,2S,4R)-p-Menth-8-ene-1,2,10-triol 2-glucoside	metab_14776	0.008345	0.6231	3.581	0.8639	4.414	0.2754	3.58	0.3835	3.792	0.5168	0.9314	1	0.1138	0.9323	0.3176	0.1144
1,3,11(13)-Eudesmatrien-12-oic acid	metab_13832	0.03468	0.6855	4.168	0.3347	3.18	0.5511	4.003	0.7091	3.905	0.7235	0.9939	0.9725	0.1657	0.9007	0.256	0.07256
Ethyl gallate	metab_11067	0.03097	0.6855	3.977	0.1217	3.726	0.1424	3.736	0.1597	3.796	0.1233	0.902	0.05159	0.9995	0.1933	0.8543	0.0405
Tenulin	metab_5787	0.004826	0.102	4.162	0.2694	3.757	0.09991	3.978	0.3056	4.056	0.1305	0.9435	0.562	0.408	0.8724	0.1701	0.0378
Isonicotinic acid	metab_8204	0.02224	0.257	3.98	0.02334	3.937	0.02637	3.919	0.03439	3.944	0.03161	0.5458	0.01633	0.7694	0.2413	0.9815	0.1244
2-ISOPROPYL-3-METHOXYCINNAMIC ACID	metab_3553	0.0006034	0.02351	3.996	0.08328	3.776	0.05764	3.788	0.1053	3.947	0.05526	0.01947	0.001972	0.9949	0.7589	0.01126	0.001114
2,4-Dihydroxy-2H-1,4-benzoxazin-3(4H)-one	metab_15895	0.029	0.6855	3.376	0.4692	4	0.208	3.242	0.6061	3.829	0.3307	0.1685	0.9608	0.04968	0.3688	0.9233	0.1318
Methionyl-Proline	metab_3041	0.039	0.3453	3.979	0.3557	3.515	0.3706	3.636	0.3281	4.317	0.4891	0.05295	0.524	0.9614	0.5361	0.01836	0.2691
Isovalerylglutamic acid	metab_16453	0.01829	0.6855	3.308	0.46	3.845	0.4114	3.098	0.3878	4.054	0.5754	0.01794	0.892	0.08148	0.08203	0.8934	0.2903
2,4,6-Trihydroxybenzoic acid	metab_14947	0.04106	0.6855	3.572	0.05602	3.567	0.2115	3.705	0.2317	3.362	0.1435	0.02513	0.6354	0.608	0.2597	0.2788	1
(R)-1-O-b-D-glucopyranosyl-1,3-octanediol	metab_15391	0.02322	0.6855	3.409	0.5648	3.273	0.5531	2.886	0.5868	3.974	0.4042	0.01887	0.4282	0.6676	0.3618	0.192	0.9776
4'-Hydroxy-5,6,7,8-tetramethoxyflavone	metab_11503	0.04651	0.6855	2.525	0.4763	3.898	1.115	3.209	1.308	3.566	0.8126	0.9394	0.695	0.6903	0.3613	0.9504	0.1521
3,4,5-trihydroxy-6-[4-hydroxy-3-(phenoxycarbonyl)phenoxy]oxane-2-carboxylic acid	metab_15324	0.02387	0.6855	2.607	0.4264	2.939	0.8082	3.925	0.8582	3.29	0.2831	0.4235	0.01845	0.1026	0.3609	0.8261	0.8484
2,2,6,6-Tetramethyl-4-piperidinone	metab_14805	0.04323	0.6855	2.98	0.9953	3.403	0.5416	2.535	0.5219	3.594	0.618	0.1067	0.7485	0.2315	0.52	0.9726	0.776
Salviaflaside	metab_15162	0.01598	0.6815	2.358	0.07818	3.12	0.7395	3.446	0.7739	2.887	0.6626	0.5159	0.05611	0.8482	0.561	0.9371	0.2555
3-O-Acetylepisamarcandin	metab_3450	0.0176	0.2227	2.865	1.4	1.636	0.3764	1.546	0.3008	3.222	1.057	0.03796	0.132	0.9986	0.9259	0.05281	0.175
Kaempferol-3-Glucuronide	metab_1157	0.0385	0.3428	1.544	0.01851	1.726	0.3344	3.861	1.69	1.947	0.6315	0.01629	0.003289	0.006829	0.9	0.9811	0.9893
Silibinin	metab_15136	0.03679	0.6855	3.96	0.4839	2.508	1.342	2.587	1.995	1.809	1.814	0.8532	0.503	0.9998	0.1481	0.8883	0.4556

## Sheet: TableS5
Supplementary Table5. Transcriptome sequencing raw data and quality control data of C. equisetifolia
Sample	Raw reads	Raw bases	Clean reads	Clean bases	Error rate(%)	Q20(%)	Q30(%)	GC content(%)
MIX36_6	45062886	6804495786	43497602	6418182744	0.0261	97.67	93.11	46.67
MIX36_5	46524584	7025212184	45485272	6670785801	0.0256	97.89	93.66	47.11
MIX36_4	50044560	7556728560	48566296	7166570779	0.026	97.7	93.18	46.92
MIX36_3	46534178	7026660878	45229764	6630790628	0.026	97.7	93.19	46.99
MIX36_2	45700498	6900775198	44067882	6453669723	0.0259	97.73	93.33	47.2
MIX36_1	47863004	7227313604	46242426	6773899973	0.0259	97.75	93.3	46.98
BYR6_6	46347712	6998504512	44832764	6561698695	0.0262	97.65	93.1	47.02
BYR6_5	46400340	7006451340	44908730	6603422501	0.0265	97.53	92.83	46.97
BYR6_4	44331690	6694085190	42691572	6261471188	0.0263	97.6	93.02	47.05
BYR6_3	43141252	6514329052	41503584	6111882651	0.0258	97.76	93.42	47.01
BYR6_2	42421272	6405612072	40940026	6001538987	0.026	97.72	93.27	46.9
BYR6_1	44357572	6697993372	42910136	6345119767	0.0263	97.59	92.93	46.98
BAR3_6	42132044	6361938644	40752284	6012538748	0.0258	97.78	93.4	47.11
BAR3_5	45942306	6937288206	44435568	6547780186	0.0261	97.65	93.1	47.41
BAR3_4	48553358	7331557058	46917942	6870265492	0.026	97.71	93.28	47.27
BAR3_3	45931010	6935582510	44631736	6533422363	0.0257	97.83	93.55	47.33
BAR3_2	45258326	6834007226	43801290	6414869860	0.0257	97.81	93.5	47.24
BAR3_1	47775162	7214049462	46270646	6779073501	0.0261	97.69	93.18	47.45
CK_6	52043146	7858515046	48944058	6997976885	0.0266	97.47	92.89	47.05
CK_5	46428906	7010764806	44955750	6640170328	0.026	97.69	93.23	47.27
CK_4	48855934	7377246034	46956896	6861721945	0.026	97.7	93.28	47.39
CK_3	46603716	7037161116	44769518	6564858950	0.0262	97.62	93.05	47.23
CK_2	43942470	6635312970	42299236	6230760736	0.0261	97.65	93.12	47.46
CK_1	47178400	7123938400	45478732	6661741116	0.0262	97.66	93.09	47.28

## Sheet: TableS6
	Supplementary Table 6. qRT-PCR primer sequences
Name	Forward (5'-3')	Reverse (5'-3')
4CL	TCTGGGTCAGGGTTACGGG	GTGGCCTCGGCATCATTCA
CHS	GCATCCAAGGCAATCAAAG	TCCAAATGGGAATCAGAGG
CYP75A	GATGATAGAGGAGCATACAGC	TGTCTAACATCTCCGCAAG
HCT	TTCTATGGCGACCTCTTGC	TGATGGTGACATTGGGATT
LOX2S	GCATTCAACGGGTATCTGG	TAGGCGACGGAGCATAGTT
DFR	CCTCGTTTAGGTTCACTCA	TAATACTGGCCTTTGTTGC
auxin-repressed kDa-like	ATCGGCTCGGAAGGACAA	ACCAGTCGTAGACGGTGGG
light-regulated-like	CGTTGCTCCCACTCTTCT	TCTCCGCCTACAGTCTCG
catalase	TCACCCTTCTGGACGACG	AACCCTTGGCACTGGCTC
metallothionein1	CCCTGTCCTTGGTTTGTCA	TCCTTCAACGCTCATCTCA
EF1α	TGGCATGTACTTGAGGATCACA	TGCATTGATGGCACGAAGC
